## ERRATUM

In the March 2004 issue of the Journal, in the Pain and Regional Anesthesia article by Ginosar *et al.* entitled “ED<sub>50</sub> and ED<sub>95</sub> of Intrathecal Hyperbaric Bupivacaine Coadministered with Opioids for Cesarean Delivery” (ANESTHESIOLOGY 2004; 100:676–82), the authors reported the following data:

|                                | ED <sub>50</sub> ± SE (mg) | γ ± SE (mg) | ED <sub>95</sub> ± SE (mg) |
|--------------------------------|----------------------------|-------------|----------------------------|
| Success <sub>(induction)</sub> | 6.7±0.6                    | 5.7±1.8     | 11.0                       |
| Success <sub>(operation)</sub> | 7.6±0.4                    | 8.2±2.1     | 11.2                       |

An error occurred in the data processing, and the corrected ED<sub>50</sub> and ED<sub>95</sub> values and slopes are reported below.

|                                | ED <sub>50</sub> ± SE (mg) | γ ± SE (mg) | ED <sub>95</sub> ± SE (mg) |
|--------------------------------|----------------------------|-------------|----------------------------|
| Success <sub>(induction)</sub> | 6.50±0.44                  | 10.3 ±2.8   | 8.65±0.46                  |
| Success <sub>(operation)</sub> | 7.64±0.45                  | 8.16±2.1    | 11.0 ±0.95                 |

While we regret the error, it should be noted that there is minimal change in the clinical message from this data: namely that when using a single-shot technique for spinal anesthesia for Cesarean section, doses of intrathecal bupivacaine below the ED<sub>95</sub> (11 mg) and particularly below the ED<sub>50</sub> (7.6 mg) are likely to lead to an unacceptably high incidence of anesthesia failure.

## ERRATUM

In the December 2004 issue of the Journal, in the Case Report by Jacob *et al.* entitled “Transient Profound Neurologic Deficit Associated with Thoracic Epidural Analgesia in an Elderly Patient” (ANESTHESIOLOGY 2004; 101:1470–1), the first sentence of the “Case Report” section currently reads:

A 91 yr-old, 152-cm, 52-kg female was scheduled to undergo elective thoracotomy for repair of a symptomatic type III paraesophageal hiatal hernia using the Belsey Mark intravenous procedure.

This sentence should read:

A 91-yr-old, 152-cm, 52-kg female was scheduled to undergo elective thoracotomy for repair of a symptomatic type III paraesophageal hiatal hernia using the Belsey Mark IV procedure.

The publisher regrets the error.
